# Supplementary material for: Transcriptome analysis unveils the mechanisms of lipid metabolism response to grayanotoxin I stress in Spodoptera litura
Source: PeerJ. 2023 Dec 6;11:e16238. doi: 10.7717/peerj.16238 (PMC10710133; doi:10.7717/peerj.16238)
Supplement: Data S1 [file peerj-11-16238-s002.xlsx]

## Sheet: read_count.Control vs GTXI
id	baseMean	baseMean_CK	baseMean_MZM	foldChange(MZM/CK)	log2FoldChange	pval	padj
LOC111360464	4.11016	0.342756	7.87757	22.983	4.5225	0.00486742	0.331341
LOC111360331	2.74396	0.321067	5.16685	16.0928	4.00834	0.0393751	0.855887
LOC111348313	3.70142	0.674377	6.72845	9.97729	3.31865	0.0373764	0.834468
LOC111364273	14.6967	3.53173	25.8617	7.32265	2.87237	4.29e-05	0.0231672
LOC111355893	10.9314	2.93298	18.9298	6.45412	2.69022	0.00077016	0.116821
LOC111356266	15.8051	4.29229	27.318	6.36443	2.67003	5.68e-05	0.025549
LOC111364435	26.4906	10.2493	42.7319	4.16926	2.05979	0.00013013	0.0403949
LOC111355779	7.97316	3.09478	12.8515	4.15265	2.05403	0.0178642	0.594854
LOC111349607	11.0596	4.74349	17.3757	3.66307	1.87305	0.025823	0.72409
LOC111349926	10.5274	4.64676	16.408	3.53107	1.82011	0.0165809	0.575587
LOC111350443	8.97377	4.02574	13.9218	3.4582	1.79002	0.0292955	0.754279
LOC111350126	51.9712	23.6305	80.3119	3.39866	1.76496	1.53e-05	0.0148811
LOC111349192	89.0626	41.3564	136.769	3.30708	1.72556	0.000117062	0.0388952
LOC111353885	12.9276	6.11394	19.7413	3.2289	1.69104	0.0121569	0.495341
LOC111356317	247.19	117.068	377.313	3.22304	1.68842	0.000470281	0.0875037
LOC111354762	8.47475	4.02515	12.9244	3.2109	1.68298	0.0453568	0.896102
LOC111359230	9.12978	4.34738	13.9122	3.20013	1.67813	0.0387148	0.848308
LOC111364178	10.4542	4.98952	15.9188	3.19045	1.67376	0.0283631	0.749429
LOC111349479	68.8656	32.9328	104.798	3.18218	1.67002	0.00166703	0.181746
LOC111348583	189.364	91.6185	287.109	3.13375	1.64789	0.00451795	0.318424
LOC111349573	813.057	397.84	1228.27	3.08736	1.62637	1.54e-05	0.0148811
LOC111358428	17.7574	8.70474	26.8101	3.07994	1.6229	0.0087332	0.426384
LOC111358791	80.6786	39.8372	121.52	3.05041	1.609	0.012124	0.495341
LOC111348431	286.535	141.521	431.548	3.04935	1.6085	0.0030127	0.261132
LOC111348350	82.1685	40.8061	123.531	3.02727	1.59802	0.00187201	0.194954
LOC111348450	148.87	74.8777	222.862	2.97634	1.57354	0.000269356	0.0616419
LOC111364529	479.122	241.031	717.213	2.97561	1.57318	1.6e-05	0.0148811
LOC111349188	179.552	90.8252	268.279	2.9538	1.56257	0.00040672	0.0799406
LOC111358979	9.31068	4.74349	13.8779	2.92567	1.54876	0.0498075	0.919166
LOC111359763	13.1911	6.81	19.5722	2.87403	1.52308	0.0223148	0.662559
LOC111348473	415.746	216.247	615.245	2.8451	1.50848	0.00537919	0.343566
LOC111348937	419.034	218.028	620.04	2.84386	1.50785	0.0220181	0.662213
LOC111351850	19.3306	10.0963	28.5648	2.82924	1.50042	0.00726672	0.40153
LOC111349500	121.47	63.5213	179.418	2.82454	1.49801	0.00375041	0.2905
LOC111364713	19.6998	10.397	29.0026	2.78951	1.48001	0.00574511	0.348578
LOC111349648	307.987	163.054	452.92	2.77774	1.47391	0.000731262	0.113438
LOC111356544	47.7467	25.417	70.0763	2.75707	1.46313	0.0002277	0.0547854
LOC111352899	16.6794	8.90739	24.4514	2.74507	1.45684	0.0156673	0.56061
LOC111354839	1759.08	939.556	2578.61	2.7445	1.45654	1.95e-08	0.0001
LOC111349184	480.062	259.645	700.48	2.69784	1.4318	2.34e-05	0.0171148
LOC111360227	19.528	10.5766	28.4794	2.69267	1.42904	0.0450619	0.896102
LOC111349390	119.649	64.9353	174.362	2.68516	1.42501	0.00395725	0.297056
LOC111357434	308.159	167.344	448.975	2.68295	1.42382	0.00738781	0.405893
LOC111353054	35.0734	19.1874	50.9593	2.65588	1.40919	0.000893079	0.124278
LOC111361898	319.67	175.683	463.658	2.63917	1.40009	0.0330208	0.793124
LOC111350734	14.7641	8.22266	21.3056	2.59108	1.37355	0.0260229	0.7263
LOC111350688	332.409	185.184	479.635	2.59005	1.37298	0.00095305	0.126799
LOC111348442	224.023	125.111	322.935	2.58117	1.36803	0.012157	0.495341
LOC111359231	27.3814	15.4291	39.3336	2.54931	1.3501	0.00447936	0.317307
LOC111361905	361.431	203.736	519.126	2.54804	1.34939	0.0124321	0.500109
LOC111357619	230.416	130.397	330.435	2.53406	1.34145	0.0032595	0.26915
LOC111349318	16441	9350.19	23531.8	2.51672	1.33154	0.000716948	0.113438
LOC111349319	352.279	200.548	504.009	2.51315	1.3295	0.000113888	0.0387637
LOC111357803	2276.1	1295.78	3256.42	2.5131	1.32947	0.00171878	0.185323
LOC111348356	1567.56	893.623	2241.51	2.50834	1.32673	0.00981913	0.446339
LOC111348151	56.3808	32.4109	80.3508	2.47913	1.30983	0.0133838	0.520254
LOC111349527	123.468	71.188	175.749	2.4688	1.30381	0.00759787	0.407794
LOC111352165	4229.43	2438.98	6019.87	2.46819	1.30345	0.000493085	0.0894462
LOC111358092	366.808	211.662	521.955	2.46598	1.30216	0.0231228	0.673649
LOC111356505	1521.35	880.451	2162.26	2.45585	1.29622	0.0149836	0.547988
LOC111359859	16.3656	9.47527	23.256	2.45438	1.29536	0.0290372	0.753764
LOC111359064	1684.45	978.696	2390.2	2.44223	1.2882	0.0194261	0.621427
LOC111348898	1087.76	632.069	1543.46	2.44191	1.28801	0.000111072	0.0387502
LOC111350239	23.7111	13.781	33.6411	2.44112	1.28754	0.0108434	0.474356
LOC111349195	61.3132	35.6438	86.9826	2.44033	1.28708	0.0109222	0.476311
LOC111354773	1273.39	741.175	1805.61	2.43615	1.2846	0.00210252	0.209108
LOC111351175	478.989	279.844	678.134	2.42326	1.27695	2.45e-05	0.0171148
LOC111348751	202.48	118.494	286.466	2.41757	1.27356	7.38e-05	0.0285894
LOC111350414	124.304	72.7666	175.842	2.41652	1.27293	0.000493541	0.0894462
LOC111354568	153.329	90.0124	216.646	2.40685	1.26714	0.00364207	0.287147
LOC111351250	765.215	449.506	1080.92	2.40469	1.26585	0.000273866	0.0616419
LOC111348390	369.914	217.316	522.513	2.40439	1.26567	0.000217631	0.0532815
LOC111357569	250.043	147.39	352.695	2.39294	1.25878	0.00178857	0.189624
LOC111364549	1062.51	627.527	1497.5	2.38636	1.25481	0.000102045	0.0374431
LOC111361830	15.96	9.45358	22.4664	2.3765	1.24884	0.0396579	0.856696
LOC111349172	196.318	117.216	275.421	2.34969	1.23247	0.000630691	0.104777
LOC111358083	5221.01	3119.03	7322.99	2.34784	1.23133	0.000605827	0.103101
LOC111356378	2009.36	1200.89	2817.84	2.34646	1.23049	0.000954058	0.126799
LOC111363292	2870.25	1717.36	4023.15	2.34263	1.22813	0.0122105	0.495341
LOC111363854	80.0517	48.0317	112.072	2.33328	1.22236	0.000132555	0.0403949
LOC111359105	2749.46	1660.43	3838.49	2.31174	1.20898	0.00347308	0.278545
LOC111348389	329.915	199.776	460.054	2.30285	1.20342	0.000502832	0.0899617
LOC111349196	214.996	130.32	299.671	2.2995	1.20132	0.0138152	0.531105
LOC111348865	508.732	308.775	708.688	2.29516	1.19859	0.000677889	0.109999
LOC111361564	133.366	81.2882	185.444	2.28132	1.18987	0.00294877	0.257188
LOC111349664	332.621	202.91	462.331	2.2785	1.18808	0.0319942	0.785085
LOC111362711	1219.88	745.847	1693.91	2.27112	1.1834	0.00553091	0.343566
LOC111362718	2743.93	1683.17	3804.69	2.26043	1.1766	0.0141339	0.538739
LOC111358657	13897.3	8532.56	19261.9	2.25746	1.1747	0.00182336	0.191315
LOC111350500	347.856	214.925	480.786	2.23699	1.16156	0.00289886	0.256035
LOC111361051	18.8903	11.6819	26.0988	2.23412	1.15971	0.0322191	0.788593
LOC111349200	197.938	122.472	273.404	2.23238	1.15858	0.0118994	0.491165
LOC111362719	3275.47	2032.32	4518.63	2.22339	1.15276	0.011643	0.491165
LOC111364801	137.106	85.3936	188.819	2.21116	1.14481	0.0144144	0.538739
LOC111361555	37.6574	23.4814	51.8335	2.20743	1.14237	0.00568722	0.348093
LOC111357719	98.515	61.4569	135.573	2.20599	1.14142	0.0150527	0.547988
LOC111348495	40.3012	25.1604	55.442	2.20354	1.13982	0.012513	0.501779
LOC111364695	24.4124	15.2564	33.5683	2.20027	1.13768	0.0204351	0.633448
LOC111349005	403.779	254.024	553.534	2.17906	1.12371	0.00201515	0.206087
LOC111349146	1309.6	824.852	1794.35	2.17536	1.12126	0.0079916	0.411523
LOC111360463	1328.56	837.553	1819.57	2.17249	1.11935	0.00681215	0.388014
LOC111363194	4920.85	3107.56	6734.13	2.16702	1.11571	0.0133427	0.520254
LOC111349399	2002.9	1266.13	2739.67	2.16382	1.11358	0.00150346	0.171974
LOC111352061	113.83	72.1586	155.502	2.155	1.10769	0.0137038	0.528277
LOC111349398	5621.14	3572.12	7670.17	2.14723	1.10248	0.00505612	0.338284
LOC111355491	272.534	173.25	371.818	2.14614	1.10175	0.00536033	0.343566
LOC111349517	11250.9	7165.38	15336.3	2.14034	1.09784	0.00156727	0.177319
LOC111349396	3318.89	2115.63	4522.15	2.13749	1.09592	0.00497259	0.336857
LOC111351790	771.188	493.01	1049.37	2.12849	1.08983	1.28e-05	0.0148811
LOC111358962	1903.77	1217.5	2590.04	2.12734	1.08905	6.46e-05	0.0273293
LOC111355891	2099.67	1342.94	2856.41	2.12699	1.08881	0.0479478	0.90446
LOC111360790	931.373	595.83	1266.92	2.1263	1.08835	0.00087269	0.124269
LOC111355095	1339.78	858.818	1820.74	2.12005	1.0841	0.00514479	0.338659
LOC111360928	154.899	99.3146	210.483	2.11936	1.08363	5.38e-05	0.025549
LOC111357527	429.871	275.729	584.012	2.11806	1.08274	0.0136116	0.526178
LOC111362324	872.296	560.582	1184.01	2.11211	1.07869	0.03468	0.795986
LOC111359527	23.031	14.8281	31.234	2.10641	1.07479	0.0332379	0.794239
LOC111353089	15952.8	10298.3	21607.4	2.09816	1.06913	0.000310393	0.0646497
LOC111350551	1503.99	971.691	2036.29	2.09561	1.06737	0.0182812	0.601593
LOC111359173	6582.2	4261.41	8902.99	2.08921	1.06296	0.00319274	0.268003
LOC111359063	3517.26	2277.49	4757.03	2.08872	1.06262	0.0286689	0.749429
LOC111358481	895.451	580.857	1210.04	2.0832	1.0588	0.0165106	0.574578
LOC111349197	3472.34	2257.27	4687.41	2.07658	1.05421	0.00843349	0.421825
LOC111364230	314.857	204.842	424.871	2.07414	1.05251	0.0100979	0.451425
LOC111352868	657.071	427.522	886.621	2.07386	1.05232	0.00694621	0.392447
LOC111360944	15881.4	10348.2	21414.6	2.06941	1.04922	0.000377701	0.0752973
LOC111359390	21.5546	14.0578	29.0514	2.06657	1.04724	0.0400076	0.860256
LOC111349612	7834.87	5122.56	10547.2	2.05896	1.04192	0.00280687	0.251089
LOC111358963	1278.1	836.243	1719.97	2.05678	1.04039	0.00278225	0.250493
LOC111349400	3266.12	2139.72	4392.52	2.05284	1.03762	0.0037041	0.290397
LOC111355196	27321.5	17901.7	36741.3	2.0524	1.03731	0.00359067	0.284732
LOC111356099	315.904	207.02	424.789	2.05192	1.03697	3.85e-05	0.0231672
LOC111353582	16965.7	11121	22810.3	2.0511	1.03639	0.0016384	0.18003
LOC111358205	53.6971	35.2057	72.1886	2.05048	1.03596	0.00697588	0.392534
LOC111360349	133.442	87.5882	179.296	2.04703	1.03353	0.00957352	0.440111
LOC111349626	75.7955	49.8688	101.722	2.0398	1.02842	0.00617325	0.366586
LOC111349199	4739.96	3124.15	6355.78	2.0344	1.02461	0.019591	0.621427
LOC111351221	32.3213	21.3153	43.3273	2.03269	1.02339	0.0479451	0.90446
LOC111349473	631.761	417.096	846.427	2.02934	1.02101	0.00313699	0.266931
LOC111347770	145.23	95.904	194.557	2.02866	1.02053	0.0211126	0.647531
LOC111352109	1268.27	837.832	1698.71	2.02751	1.01971	0.0089425	0.430319
LOC111358479	491.27	325.2	657.339	2.02134	1.01531	0.0100551	0.451186
LOC111353850	125.996	83.4145	168.577	2.02096	1.01504	0.000300649	0.0638246
LOC111349699	526.928	349.063	704.793	2.0191	1.01371	0.0451861	0.896102
LOC111360972	11869	7868.08	15870	2.01701	1.01222	0.00390281	0.295998
LOC111350181	1829.56	1213.58	2445.55	2.01516	1.01089	0.00966144	0.44205
LOC111352242	899.035	597.478	1200.59	2.00943	1.00679	0.0159221	0.561537
LOC111349502	6946.63	4618.31	9274.95	2.0083	1.00597	0.0290312	0.753764
LOC111349696	10995.1	7311.54	14678.6	2.0076	1.00547	0.0044768	0.317307
LOC111355862	46.5664	30.9726	62.1602	2.00694	1.005	0.00791445	0.410409
LOC111348387	580.875	386.993	774.756	2.00199	1.00143	0.00446698	0.317307
LOC111359477	110.178	146.907	73.4493	0.499972	-1.00008	0.00926449	0.436437
LOC111354016	491.597	659.164	324.031	0.491579	-1.02451	0.00248227	0.236889
LOC111350322	143.588	192.953	94.2229	0.488322	-1.0341	0.000149989	0.0424127
LOC111364475	3596.12	4834.29	2357.95	0.487755	-1.03577	0.0454232	0.896102
LOC111358206	6932.54	9328.25	4536.82	0.486353	-1.03992	0.0413495	0.871649
LOC111358278	30.3954	40.9093	19.8815	0.48599	-1.041	0.0488713	0.910489
LOC111349739	324.64	437.578	211.703	0.483806	-1.0475	0.00337703	0.272407
LOC111355428	1347.2	1815.99	878.406	0.483707	-1.0478	0.00551704	0.343566
LOC111359048	21.8744	29.5191	14.2296	0.482047	-1.05276	0.0428072	0.886312
LOC111348993	546.927	738.971	354.882	0.480238	-1.05818	0.0323801	0.788593
LOC111360203	4656.94	6295.77	3018.1	0.479386	-1.06074	0.00574423	0.348578
LOC111350951	68.2996	92.3466	44.2526	0.479201	-1.0613	0.0269116	0.734935
LOC111362850	23.2866	31.5956	14.9776	0.474041	-1.07692	0.032011	0.785085
LOC111352006	25.5296	34.742	16.3172	0.469667	-1.09029	0.0239634	0.693794
LOC111349635	55.0437	74.9148	35.1726	0.469502	-1.0908	0.0174598	0.589435
LOC111361976	106.266	144.83	67.7007	0.467449	-1.09712	0.0142094	0.538739
LOC111361973	32.3219	44.1305	20.5134	0.464834	-1.10521	0.0113228	0.487682
LOC111360163	630.805	867.466	394.144	0.454362	-1.13809	3.49e-05	0.022154
LOC111356619	30.6995	42.2225	19.1765	0.454178	-1.13867	0.0126259	0.504426
LOC111354365	182.94	251.793	114.087	0.453099	-1.1421	0.000991968	0.127929
LOC111350601	20.8236	28.7662	12.881	0.447783	-1.15913	0.0296346	0.758808
LOC111352537	685.312	948.99	421.633	0.444297	-1.1704	0.0013362	0.155389
LOC111348068	1417.69	1966.6	868.772	0.441763	-1.17865	0.00402633	0.298869
LOC111350394	604.889	839.767	370.01	0.440611	-1.18242	0.0303683	0.77283
LOC111354878	36.4804	50.7017	22.2591	0.439021	-1.18764	0.0327029	0.789666
LOC111363282	22.2691	31.0031	13.5351	0.436573	-1.1957	0.0351231	0.798277
LOC111354790	81.6306	113.785	49.476	0.434819	-1.20151	0.00261029	0.241236
LOC111354604	539.963	759.672	320.253	0.421567	-1.24617	0.000965857	0.127156
LOC111349586	35.3776	49.8165	20.9388	0.420319	-1.25044	0.0031102	0.266275
LOC111358277	1729.69	2438.38	1021	0.41872	-1.25594	0.0119315	0.491165
LOC111350956	153.935	217.11	90.7588	0.41803	-1.25832	0.0346145	0.795986
LOC111355088	589.944	833.357	346.532	0.415826	-1.26595	0.000187916	0.0494786
LOC111355598	14.4505	20.4195	8.48145	0.415361	-1.26756	0.0439935	0.894662
LOC111354746	341.266	482.239	200.293	0.41534	-1.26764	0.0010094	0.127929
LOC111354263	80.3177	113.519	47.1167	0.415057	-1.26862	0.0199242	0.626222
LOC111354546	285.438	403.686	167.19	0.414158	-1.27175	0.0185031	0.601593
LOC111363693	16.9618	24.0028	9.92088	0.413322	-1.27466	0.0307521	0.77283
LOC111349277	194.784	276.158	113.409	0.410668	-1.28396	0.0482184	0.90446
LOC111351015	67.2092	95.5471	38.8714	0.40683	-1.2975	0.0175289	0.589435
LOC111356424	333.671	475.425	191.918	0.403677	-1.30873	0.00359103	0.284732
LOC111349631	115.685	165.464	65.9072	0.398318	-1.32801	0.00121173	0.144527
LOC111360423	47.7211	68.3725	27.0697	0.395915	-1.33674	0.00328991	0.269179
LOC111349600	1511.14	2166.36	855.93	0.395101	-1.33971	5.36e-05	0.025549
LOC111365134	541.992	777.458	306.527	0.394268	-1.34275	0.000157293	0.0430396
LOC111360656	13.7848	19.7848	7.78489	0.393479	-1.34564	0.0348131	0.796421
LOC111351360	73.1992	105.324	41.0739	0.389976	-1.35854	4.17e-05	0.0231672
LOC111355199	776.903	1118.1	435.711	0.389691	-1.3596	2.52e-07	0.000704079
LOC111349522	18.0108	26.0054	10.0163	0.385161	-1.37647	0.0155792	0.56061
LOC111360381	16.2943	23.543	9.0456	0.384216	-1.38001	0.0222266	0.662559
LOC111351785	12.715	18.3834	7.0465	0.383307	-1.38343	0.0431213	0.888545
LOC111348608	1127.62	1630.54	624.705	0.383128	-1.3841	0.0220672	0.662254
LOC111357368	1313.94	1901.05	726.84	0.382337	-1.38708	0.0051408	0.338659
LOC111355709	15.3337	22.186	8.48145	0.382288	-1.38727	0.024286	0.700229
LOC111348525	423.877	613.367	234.387	0.382132	-1.38786	0.0450566	0.896102
LOC111351397	269.185	389.604	148.765	0.381837	-1.38897	0.00122303	0.144638
LOC111348849	16.7914	24.3387	9.24419	0.379815	-1.39663	0.0478022	0.90446
LOC111347762	45.047	65.3764	24.7177	0.378083	-1.40323	0.00275822	0.249941
LOC111349352	433.622	630.133	237.111	0.376288	-1.41009	0.040299	0.861498
LOC111349638	334.815	486.667	182.964	0.375952	-1.41138	0.00898595	0.430509
LOC111364678	692.462	1007.98	376.949	0.373967	-1.41902	5.27e-05	0.025549
LOC111360865	233.084	339.514	126.654	0.373045	-1.42258	0.0015756	0.177319
LOC111359946	75.7157	110.348	41.0836	0.37231	-1.42542	0.0149126	0.547988
LOC111348366	212.177	310.358	113.995	0.367299	-1.44497	0.0416621	0.874812
LOC111363953	21.1064	30.8816	11.3312	0.366923	-1.44645	0.0195086	0.621427
LOC111354605	840.098	1230.32	449.874	0.365655	-1.45144	1.34e-05	0.0148811
LOC111351385	288.227	422.523	153.932	0.364316	-1.45674	0.00196654	0.203282
LOC111349707	150.804	221.219	80.3889	0.36339	-1.46041	0.0339581	0.795109
LOC111353023	2578.76	3782.89	1374.62	0.363378	-1.46046	0.0220184	0.662213
LOC111349521	228.354	334.994	121.714	0.363332	-1.46064	4.72e-09	6.58e-05
LOC111348951	33.555	49.3995	17.7106	0.358518	-1.47988	0.000731597	0.113438
LOC111361971	132.693	195.78	69.6066	0.355534	-1.49194	0.0267467	0.733154
LOC111348321	504.426	745.467	263.384	0.353315	-1.50097	0.00986129	0.4468
LOC111356581	41.0878	60.7935	21.3821	0.351716	-1.50752	0.0441559	0.894662
LOC111358024	73.3415	108.59	38.0933	0.350801	-1.51128	0.000835496	0.120199
LOC111353254	2058.76	3051.29	1066.23	0.349436	-1.5169	0.045152	0.896102
LOC111348537	22.604	33.532	11.676	0.348204	-1.52199	0.00319585	0.268003
LOC111350001	291.262	432.596	149.928	0.346577	-1.52875	0.00706222	0.394213
LOC111359549	9.49345	14.1525	4.83437	0.34159	-1.54966	0.047567	0.90446
LOC111364931	11.5043	17.1623	5.84626	0.340646	-1.55366	0.0274245	0.741684
LOC111359938	2099.26	3132.84	1065.67	0.340162	-1.55571	4.32e-05	0.0231672
LOC111350043	330.292	495.347	165.237	0.333579	-1.5839	0.000145056	0.0421722
LOC111361992	1152.25	1731.55	572.95	0.330889	-1.59558	0.00249535	0.236889
LOC111364953	2109.09	3174.84	1043.34	0.328629	-1.60547	0.00435659	0.315006
LOC111351318	29.6868	44.7247	14.6488	0.327531	-1.6103	0.00811559	0.414568
LOC111348768	1214.53	1830.12	598.95	0.327274	-1.61143	0.00202322	0.206087
LOC111357325	10.0448	15.1503	4.93938	0.326026	-1.61694	0.0307754	0.77283
LOC111349554	275.097	415.022	135.173	0.325699	-1.61839	0.000301858	0.0638246
LOC111353793	1955.29	2952.84	957.738	0.324344	-1.6244	3.19e-05	0.0211872
LOC111347831	914.663	1393.17	436.154	0.313066	-1.67546	0.00010088	0.0374431
LOC111348531	14.1234	21.5396	6.7071	0.311385	-1.68323	0.00953283	0.440111
LOC111355470	138.898	212.202	65.5935	0.30911	-1.69381	0.00457523	0.320841
LOC111350197	206.542	315.933	97.1508	0.307504	-1.70132	1.89e-05	0.0164971
LOC111361991	6392.98	9778.92	3007.03	0.307501	-1.70134	0.000418778	0.0811673
LOC111365071	25.2725	38.7523	11.7927	0.30431	-1.71639	0.0311138	0.776731
LOC111359342	738.577	1137.39	339.762	0.298721	-1.74313	0.00652649	0.379488
LOC111358878	9.77567	15.0735	4.47782	0.297065	-1.75115	0.0241483	0.6977
LOC111353471	8.45079	13.0523	3.84926	0.294909	-1.76166	0.0394969	0.855914
LOC111362505	184.245	284.628	83.8624	0.294639	-1.76298	0.000133154	0.0403949
LOC111353024	5018.92	7758.4	2279.43	0.293802	-1.76708	0.00953826	0.440111
LOC111357657	334.585	518.9	150.27	0.289592	-1.7879	1.34e-05	0.0148811
LOC111353928	957.421	1496.92	417.919	0.279186	-1.8407	0.000162972	0.043736
LOC111359922	2334.71	3660.79	1008.62	0.27552	-1.85977	0.00215259	0.211545
LOC111355378	2510.32	3936.86	1083.78	0.275291	-1.86097	0.000810051	0.119917
LOC111356478	108.811	171.721	45.9011	0.2673	-1.90347	6.57e-07	0.00152784
LOC111354667	489.3	773.115	205.484	0.265788	-1.91165	0.00117327	0.142374
LOC111360037	41.6417	66.0463	17.237	0.260984	-1.93797	2.12e-06	0.00421891
LOC111349526	9.49959	15.1081	3.89109	0.25755	-1.95707	0.0291135	0.753764
LOC111362304	7.01876	11.1679	2.86957	0.256947	-1.96046	0.0374329	0.834468
LOC111357143	15.7598	25.2034	6.31625	0.250611	-1.99648	0.00207878	0.20902
LOC111360083	18.9445	30.3536	7.53546	0.248256	-2.0101	0.000445273	0.0839701
LOC111357891	3288.41	5293.46	1283.36	0.242442	-2.04429	0.000580822	0.100066
LOC111357078	1056.72	1702.03	411.411	0.241718	-2.0486	0.000215986	0.0532815
LOC111359863	5.90168	9.52804	2.27531	0.238802	-2.06611	0.0454964	0.896102
LOC111356690	11.8458	19.1651	4.52656	0.236188	-2.08199	0.00410939	0.303421
LOC111352575	1854.53	3019.76	689.296	0.228262	-2.13124	2.15e-08	0.0001
LOC111349559	7.11398	11.6496	2.57831	0.22132	-2.17579	0.021878	0.662213
LOC111357314	846.468	1392.27	300.669	0.215957	-2.21119	6.83e-05	0.0280458
LOC111364587	10.0558	16.5407	3.57095	0.215889	-2.21164	0.00475669	0.328148
LOC111351918	94.4094	155.879	32.9398	0.211316	-2.24252	0.0189154	0.609616
LOC111348312	11.9721	19.7674	4.17693	0.211304	-2.24261	0.015079	0.547988
LOC111355935	16.5831	27.4175	5.74877	0.209675	-2.25377	0.000297189	0.0638246
LOC111347832	5.56647	9.24096	1.89199	0.204739	-2.28814	0.0379145	0.84251
LOC111358249	33.7123	56.5626	10.8621	0.192036	-2.38055	2.14e-07	0.000704079
LOC111355301	11.4864	19.4411	3.53183	0.181668	-2.46062	0.0410271	0.869422
LOC111351029	186.541	319.786	53.2952	0.166659	-2.58503	3.14e-06	0.00547513
LOC111361430	52.5974	91.0675	14.1273	0.15513	-2.68845	0.0168735	0.581408
LOC111358536	7.712	13.8109	1.61306	0.116796	-3.09794	0.00130038	0.152494
LOC111356795	3.19051	5.72838	0.652628	0.113929	-3.13379	0.0476975	0.90446
LOC111349652	3.32378	5.99493	0.652628	0.108863	-3.19941	0.0381187	0.844647
LOC111356722	3.25726	5.87905	0.635475	0.108092	-3.20967	0.0462577	0.896793
LOC111360851	3.84758	7.05487	0.640288	0.0907584	-3.46183	0.018151	0.601154
