# Supplementary material for: Transcriptome analysis unveils the mechanisms of lipid metabolism response to grayanotoxin I stress in Spodoptera litura
Source: PeerJ. 2023 Dec 6;11:e16238. doi: 10.7717/peerj.16238 (PMC10710133; doi:10.7717/peerj.16238)
Supplement: Figure S1 [file peerj-11-16238-s001.xlsx]

## Sheet: Table S1 survival 
Time(h)	0.4% matrine (n=30)		6.25mg/L (n=30)	2.5 mg/L	2.5mg/L (n=30)	2.5 mg/L	1.25 mg/L (n=30)	water	water (n=30)
	Alive	Dead	Alive	Dead	Alive	Dead	Alive	Dead	Alive	Dead
0h-R1	30	0	30	0	30	0	30	0	30	0
0h-R2	30	0	30	0	30	0	30	0	30	0
0h-R3	30	0	30	0	30	0	30	0	30	0
24h-R1	30	0	30	0	30	0	30	0	30	0
24h-R2	30	0	30	0	30	0	30	0	30	0
24h-R3	30	0	30	0	30	0	30	0	30	0
48h-R1	19	11	27	3	28	2	30	0	30	0
48h-R2	18	12	28	2	29	1	30	0	30	0
48h-R3	23	7	25	5	28	2	30	0	30	0
72h-R1	7	23	10	20	15	15	26	4	29	1
72h-R2	4	26	15	15	16	14	21	9	28	2
72h-R3	6	24	11	19	19	11	20	10	30	0

## Sheet: Table S2 body weight
Time(day)	1.25mg/L Gray I (n=15)	0.62mg/L Gray I (n=15)	0.2% Matrine (n=15)	Water (n=15)
0 day	0.58	0.69	0.67	0.54
0 day	0.62	0.5	0.54	0.41
0 day	0.59	0.74	0.61	0.68
0 day	0.62	0.59	0.59	0.52
0 day	0.6	0.49	0.49	0.51
0 day	0.63	0.64	0.79	0.63
0 day	0.61	0.74	0.53	0.67
0 day	0.62	0.46	0.69	0.52
0 day	0.6	0.45	0.51	0.59
0 day	0.61	0.69	0.72	0.4
0 day	0.59	0.59	0.73	0.69
0 day	0.6	0.77	0.69	0.58
0 day	0.59	0.62	0.68	0.53
0 day	0.61	0.78	0.53	0.78
0 day	0.59	0.43	0.78	0.67
2 day	0.93	1.26	2.72	1.28
2 day	1.2	1.02	3.58	1.54
2 day	0.75	1.11	3.94	1.24
2 day	0.61	1.28	2.26	1.52
2 day	0.73	1.32	1.75	1.23
2 day	1.14	1.54	1.41	1.53
2 day	0.81	0.87	3.78	1.1
2 day	0.89	0.98	2	1.24
2 day	1.16	0.87	2.18	0.93
2 day	0.8	0.72	3.56	0.92
2 day	0.71	0.94	2.24	1.13
2 day	1.08	0.77	3.8	1.3
2 day	0.67	0.99	2.14	1.25
2 day	1.15	0.73	dead	0.93
2 day	0.66	0.96	dead	1.06
4 day	1.99	5.53	2.16	9.54
4 day	2.36	5.12	1.54	11.49
4 day	1.59	3.23	1.82	12.03
4 day	1.69	2.55	1.88	9.54
4 day	2.41	4.78	1.72	8.35
4 day	1.43	4.22	2.2	8.08
4 day	1.46	3.1	1.86	9.45
4 day	2.18	3.13	1.944	9.05
4 day	2.76	4.65	1.8	9.46
4 day	2.18	5.24	dead	8.56
4 day	2.04	5.13	dead	7.58
4 day	1.78	3.74	dead	8.88
4 day	dead	3.78	dead	10.45
4 day	dead	3.19	dead	10.05
4 day	dead	3.01	dead	9.46
6 day	2.43	7.24	3.13	23.54
6 day	1.81	7.22	2.4	33.49
6 day	2.4	4.33	1.7	15.03
6 day	2.98	3.48	2.28	17.54
6 day	2.14	6.13	2.14	22.34
6 day	3.45	6.22	2.68	28.6
6 day	1.57	7.45	dead	16.83
6 day	2.18	8.01	dead	19.65
6 day	2.2	7.85	dead	16.53
6 day	1.42	7.46	dead	13.53
6 day	2.04	8.33	dead	25.65
6 day	dead	5.84	dead	16.24
6 day	dead	7.87	dead	20.55
6 day	dead	3.91	dead	21.54
6 day	dead	6.66	dead	20.45
8 day	7.65	25.93	6.46	83.54
8 day	9.22	25.83	5.93	93.09
8 day	10.38	21.43	5.45	114.04
8 day	7.33	21.11	dead	57.93
8 day	8.89	29.43	dead	58.78
8 day	6.03	35.44	dead	61.6
8 day	8.29	25.45	dead	65.62
8 day	7.66	37.33	dead	69.6
8 day	dead	19.78	dead	76.53
8 day	dead	27.54	dead	93.06
8 day	dead	18.73	dead	75.65
8 day	dead	26.84	dead	66.24
8 day	dead	19.07	dead	70.55
8 day	dead	23.91	dead	71.54
8 day	dead	-	dead	70.45
Ave	8.18125	25.5586	5.94667	75.2147	75.21±15.20
SD	1.47851	5.67494	0.505206	15.1962
10 day	17.86	65.93	10	283.54
10 day	13.23	75.83	dead	153.09
10 day	14.55	51.43	dead	190.2
10 day	21.26	34.11	dead	284.05
10 day	18.17	59.43	dead	228.78
10 day	24.49	82.34	dead	141.6
10 day	17.11	90.45	dead	293.91
10 day	18.66	101.93	dead	179.6
10 day	dead	59.78	dead	186.53
10 day	dead	48.64	dead	183.06
10 day	dead	58.73	dead	272.11
10 day	dead	60.84	dead	227.54
10 day	dead	59.07	dead	154.4
10 day	dead	dead	dead	128.12
10 day	dead	dead	dead	189.69
Ave	18.1663	65.27	10	206.415
SD	3.44724	18.2242	-	55.4049
12 day	32.89	175.83	15.2	344
12 day	53.98	151.43	dead	353.09
12 day	27.85	177.11	dead	396.56
12 day	20.53	159.43	dead	376.46
12 day	35.06	132.34	dead	511.54
12 day	34.55	159.4	dead	503.58
12 day	18.36	221.22	dead	393.91
12 day	49.22	190.1	dead	399.95
12 day	dead	157.4	dead	423.55
12 day	dead	122.45	dead	484.45
12 day	dead	108.94	dead	441.45
12 day	dead	159.07	dead	397.6
12 day	dead	dead	dead	355.75
12 day	dead	dead	dead	348.64
12 day	dead	dead	dead	339.78
Ave	34.055	159.56	15.2	404.687
SD	12.5206	30.2398	-	57.5777
14 day	41.36	265.04	29.04	584.65
14 day	57.44	250.78	dead	716.96
14 day	31.03	197.21	dead	596.56
14 day	57.16	250.13	dead	567.45
14 day	74.29	302.34	dead	765.9
14 day	87.76	309.12	dead	684.6
14 day	50.74	292.22	dead	575.7
14 day	dead	290.5	dead	488.2
14 day	dead	187.46	dead	543.46
14 day	dead	332.37	dead	584.45
14 day	dead	160.04	dead	491.45
14 day	dead	401.57	dead	697.6
14 day	dead	dead	dead	674.75
14 day	dead	dead	dead	648.64
14 day	dead	dead	dead	639.78
Ave	57.1114	269.898	29.04	617.343
SD	19.1637	67.2053	-	81.2965

## Sheet: Table S3 pupation time (day)
ddH2O	1.25mg/L Gray I (n=15)	0.62mg/L Gray I (n=15)	0.2% Matrine (n=15)
18	16	17	16
18	16	17	16
18	16	17	17
13	17	22	17
14	18	22	17
14	20	24	22
14	20	16	dead
14	22	16	dead
14	22	16	dead
15	24	16	dead
15	24	16	dead
15	24	20	dead
14	24	dead	dead
14	dead	dead	dead
14	dead	dead	dead
14	dead	dead	dead
14	dead	dead	dead
14	dead	dead	dead
14	dead	dead	dead
14	dead	dead	dead
14	dead	dead	dead
15	dead	dead	dead
15	dead	dead	dead
15	dead	dead	dead
15	dead	dead	dead
